# Supplementary material for: Phase stability of the nanolaminates V2Ga2C and (Mo1−xVx)2Ga2C from first-principles calculations
Source: Royal Society of Chemistry journal article supplement (doi:10.1039/c6cp00802j), 2016-01-01
Supplement: c6cp00802j2.pdf [file c6cp00802j2.pdf]

## Supplemental Material

Phase stability of the nanolaminated ternary carbide  $V_2Ga_2C$  and the quaternary alloy  $(Mo_{1-x}V_x)_2Ga_2C$  from first-principles calculations

A. Thore<sup>a,\*</sup>, M. Dahlqvist<sup>a</sup>, B. Alling<sup>a,b</sup>, and J. Rosén<sup>a</sup>

<sup>a</sup> Department of Physics, Chemistry, and Biology, Thin film physics division, Linköping University, SE-581 83 Linköping, Sweden

<sup>b</sup> Department of Computational Materials Design, Max-Planck-Institut für Eisenforschung GmbH, Max-Planck-Straße 1, 40237 Düsseldorf Nordrhein-Westfalen

\*Corresponding author. Tel.: +46 70 3212109.

E-mail address: [andth@ifm.liu.se](mailto:andth@ifm.liu.se)

E-mail addresses to co-authors:

M. Dahlqvist: [madah@ifm.liu.se](mailto:madah@ifm.liu.se)

B. Alling: [bjoal@ifm.liu.se](mailto:bjoal@ifm.liu.se)

J. Rosén: [johro@ifm.liu.se](mailto:johro@ifm.liu.se)

Table S1. All phases considered in this work, including structural data and enthalpies. For MoV alloys, the first row gives data for a crystal where all sublattices are chemically ordered (unless stated otherwise).

| Phase                               | Prototype structure                       | Pearson symbol | Space group                | a (Å)  | b (Å) | c (Å)  | H (eV/f.u.) |
|-------------------------------------|-------------------------------------------|----------------|----------------------------|--------|-------|--------|-------------|
| V                                   | W                                         | cI2            | Im-3m (229)                | 2.994  |       |        | -9.116      |
| Mo                                  | W                                         | cI2            | Im-3m (229)                | 3.169  |       |        | -10.850     |
| $\alpha$ -Ga                        | Ga                                        | oC8            | Cmca (64)                  | 4.590  | 7.753 | 4.575  | -3.030      |
| C                                   | C (graphite)                              | hP4            | P6 <sub>3</sub> /mmc (194) | 2.464  |       | 7.250  | -9.225      |
|                                     |                                           |                |                            |        |       |        |             |
| V <sub>3</sub> Ga (rt)              | Cr <sub>3</sub> Si                        | cP8            | Pm-3n (223)                | 4.791  |       |        | -31.076     |
| V <sub>6</sub> Ga <sub>5</sub> (rt) | $\alpha$ -Ti <sub>6</sub> Sn <sub>5</sub> | hP22           | P6 <sub>3</sub> /mmc (194) | 8.490  |       | 5.130  | -72.180     |
| V <sub>6</sub> Ga <sub>7</sub> (ht) | Cu <sub>5</sub> Zn <sub>8</sub>           | cI52           | I-43m (217)                | 9.171  | 9.105 | 9.149  | -77.563     |
| V <sub>2</sub> Ga <sub>5</sub> (rt) | Mn <sub>2</sub> Hg <sub>5</sub>           | tP14           | P4/mbm (127)               | 9.002  |       | 2.684  | -34.972     |
| V <sub>8</sub> Ga <sub>41</sub>     | V <sub>8</sub> Ga <sub>41</sub>           | hR147          | R-3 (148)                  | 14.016 |       | 14.971 | -205.857    |

|                                       |                                                                       |       |                               |       |       |        |          |
|---------------------------------------|-----------------------------------------------------------------------|-------|-------------------------------|-------|-------|--------|----------|
| Mo <sub>6</sub> Ga <sub>31</sub>      | Mo <sub>6</sub> Ga <sub>31</sub>                                      | mP148 | P12 <sub>1</sub> /c1<br>(14)  |       |       |        | -163.927 |
| Mo <sub>8</sub> Ga <sub>41</sub>      | V <sub>8</sub> Ga <sub>41</sub>                                       | hR147 | R-3 h (148)                   |       |       |        | -217.436 |
| MoGa <sub>4</sub>                     | CrGa <sub>4</sub>                                                     | cl10  | Im-3m<br>(229)                | 5.106 |       |        | -23.818  |
| MoGa <sub>3</sub>                     | TiAl <sub>3</sub> (NbGa <sub>3</sub> )                                | tl8   | I4/mmm<br>(139)               | 5.189 |       | 5.428  | -18.485  |
| MoGa <sub>2</sub>                     | CdI <sub>2</sub> (CrSe <sub>2</sub> )                                 | hP3   | P-3m1<br>(164)                | 2.904 |       | 6.689  | -16.658  |
| Mo <sub>2</sub> Ga <sub>3</sub>       | Ti <sub>2</sub> Ga <sub>3</sub>                                       | tP10  | P4/m (83)                     | 6.515 |       | 3.667  | -30.851  |
| MoGa                                  | FeSi (CrGe)                                                           | cP8   | P2 <sub>1</sub> 3 (198)       | 5.014 |       |        | -13.760  |
| Mo <sub>5</sub> Ga <sub>4</sub>       | Ti <sub>5</sub> Ga <sub>4</sub><br>(Nb <sub>5</sub> Ga <sub>4</sub> ) | hP18  | P6 <sub>3</sub> /mcm<br>(193) | 7.817 |       | 5.234  | -66.314  |
| Mo <sub>3</sub> Ga <sub>2</sub>       | U <sub>3</sub> Si <sub>2</sub>                                        | tP10  | P4/mbm<br>(127)               | 6.784 |       | 3.363  | -38.294  |
| Mo <sub>5</sub> Ga <sub>3</sub>       | Cr <sub>5</sub> As <sub>3</sub>                                       | oP32  | Pnma (62)                     | 9.839 | 7.807 | 6.639  | -62.659  |
| Mo <sub>2</sub> Ga                    | Cu <sub>2</sub> Sb                                                    | tP6   | P4/nmm<br>O2 (129)            | 3.682 |       | 7.062  | -24.438  |
| Mo <sub>2</sub> Ga                    | Fe <sub>2</sub> P                                                     | hP9   | P-62m<br>(189)                | 7.192 |       | 3.127  | -24.527  |
| Mo <sub>5</sub> Ga <sub>2</sub>       | Mn <sub>5</sub> Ge <sub>2</sub>                                       | hP42  | P3c1 (158)                    |       |       |        | -59.508  |
| Mo <sub>3</sub> Ga                    | Cr <sub>3</sub> Si                                                    | cP8   | Pm-3n<br>(223)                | 4.979 |       |        | -36.200  |
|                                       |                                                                       |       |                               |       |       |        |          |
| α-V <sub>2</sub> C                    | PbO <sub>2</sub> /Mo <sub>2</sub> C                                   | oP12  | Pbcn (60)                     | 4.557 | 5.743 | 5.037  | -28.890  |
| β-V <sub>2</sub> C                    | CdI <sub>2</sub>                                                      | hP3   | P6 <sub>3</sub> /mmc<br>(194) | 2.895 |       | 4.532  | -28.838  |
| VC <sub>0.5</sub>                     | NiAs                                                                  | hP4   | P6 <sub>3</sub> /mmc<br>(194) | 2.773 |       | 5.194  | -13.552  |
| VC <sub>0.5</sub>                     | NiAs                                                                  | hP4   | P6 <sub>3</sub> /mmc<br>(194) | 2.529 |       | 5.067  | -13.900  |
| VC <sub>0.67</sub>                    | TeSc <sub>0.67</sub>                                                  | hR24  | R-3m (166)                    | 2.918 |       | 27.833 | -15.951  |
| V <sub>4</sub> C <sub>3-x</sub> (x=0) |                                                                       | hP21  | R-3m (166)                    | 2.923 |       | 28.017 | -67.435  |
| V <sub>6</sub> C <sub>5</sub>         | V <sub>6</sub> C <sub>5</sub>                                         | hP33  | P3 <sub>1</sub> 12<br>(151)   | 5.100 |       | 15.277 | -106.833 |
| V <sub>8</sub> C <sub>7</sub>         | V <sub>8</sub> C <sub>7</sub>                                         | cP60  | P4132<br>(213)                | 8.340 |       |        | -145.426 |
| VC <sub>0.875</sub>                   | NaCl                                                                  | cF8   | Fm-3m<br>(225)                | 4.147 |       |        | -18.035  |
| VC                                    | NiAs                                                                  | hP4   | P6 <sub>3</sub> /mmc<br>(194) | 2.916 |       | 5.129  | -18.702  |

|                                      |                                  |      |                               |       |       |        |         |
|--------------------------------------|----------------------------------|------|-------------------------------|-------|-------|--------|---------|
| VC                                   | NaCl                             | cF8  | Fm-3m<br>(225)                | 4.164 |       |        | -19.171 |
|                                      |                                  |      |                               |       |       |        |         |
| MoC                                  | TiP                              | hP8  | P6 <sub>3</sub> /mmc<br>(194) | 3.016 |       | 10.768 | -19.821 |
| MoC                                  | NaCl                             | cF8  | Fm-3m<br>(225)                | 4.383 |       |        | -19.640 |
| MoC                                  | $\eta$ -MoC                      | hp12 |                               | 3.074 |       | 15.401 | -19.747 |
| MoC                                  | WC                               | hp2  | P-6m2<br>(187)                | 2.928 |       | 2.829  | -20.241 |
| Mo <sub>3</sub> C <sub>2</sub>       | Cr <sub>3</sub> C <sub>2</sub>   | oP20 | Pnma (62)                     | 6.064 | 2.974 | 12.654 | -50.938 |
| Mo <sub>2</sub> C                    | $\beta''$ -Mo <sub>2</sub> C     | hP3  | P-3m1<br>(164)                | 3.068 |       | 4.669  | -31.064 |
| Mo <sub>3</sub> C                    | Fe <sub>3</sub> C (Cr3C)         | oP16 | Pnma (62)                     | 5.540 | 7.559 | 5.159  | -40.423 |
|                                      |                                  |      |                               |       |       |        |         |
| Mo <sub>0.25</sub> V <sub>0.75</sub> | W                                | cl2  | Im-3m<br>(229)                | 3.040 | 3.040 | 3.044  | -9.615  |
| SQS                                  | W                                | cl2  | Im-3m<br>(229)                | 3.038 | 3.044 | 3.045  | -9.613  |
| Mo <sub>0.50</sub> V <sub>0.50</sub> | W                                | cl2  | Im-3m<br>(229)                | 3.084 | 3.084 | 3.076  | -10.082 |
| SQS                                  | W                                | cl2  | Im-3m<br>(229)                | 3.082 | 3.087 | 3.087  | -10.076 |
| Mo <sub>0.75</sub> V <sub>0.25</sub> | W                                | cl2  | Im-3m<br>(229)                | 3.126 | 3.126 | 3.134  | -10.509 |
| SQS                                  | W                                | cl2  | Im-3m<br>(229)                | 3.127 | 3.129 | 3.129  | -10.499 |
|                                      |                                  |      |                               |       |       |        |         |
| V <sub>3</sub> GaC                   | CaTiO <sub>3</sub>               | cP5  | Pm-3m<br>(221)                | 3.983 |       |        | -40.927 |
| V <sub>2</sub> GaC                   | Cr <sub>2</sub> AlC              | hP8  | P6 <sub>3</sub> /mmc<br>(194) | 2.940 |       | 12.878 | -32.565 |
| V <sub>3</sub> GaC <sub>2</sub>      | Ti <sub>3</sub> SiC <sub>2</sub> | hP12 | P6 <sub>3</sub> /mmc<br>(194) | 2.935 |       | 17.744 | -51.915 |
| V <sub>4</sub> GaC <sub>3</sub>      | Ti <sub>4</sub> AlN <sub>3</sub> | hP16 | P6 <sub>3</sub> /mmc<br>(194) | 2.932 |       | 22.624 | -71.244 |
|                                      |                                  |      |                               |       |       |        |         |
| Mo <sub>3</sub> GaC                  | Mn <sub>3</sub> GaC              | cP5  | Pm-3m<br>(221)                | 4.152 |       |        | -44.274 |
| Mo <sub>2</sub> GaC                  | Cr <sub>2</sub> AlC              | hP8  | P6 <sub>3</sub> /mmc<br>(194) | 3.068 | 4.326 | 13.272 | -34.413 |
| Mo <sub>3</sub> GaC <sub>2</sub>     | Ti <sub>3</sub> SiC <sub>2</sub> | hP12 | P6 <sub>3</sub> /mmc<br>(194) | 3.086 |       | 18.358 | -54.040 |
| Mo <sub>4</sub> GaC <sub>3</sub>     | Ti <sub>4</sub> AlN <sub>3</sub> | hP16 | P6 <sub>3</sub> /mmc<br>(194) | 3.133 |       | 23.116 | -73.789 |

|                                                            |                         |     |                                   |       |       |        |         |
|------------------------------------------------------------|-------------------------|-----|-----------------------------------|-------|-------|--------|---------|
|                                                            |                         |     |                                   |       |       |        |         |
| $(\text{Mo}_{0.25}\text{V}_{0.75})_2\text{GaC}$            | $\text{Cr}_2\text{AlC}$ | hP8 | $\text{P6}_3/\text{mmc}$<br>(194) | 2.963 |       | 13.018 | -33.082 |
| SQS                                                        | $\text{Cr}_2\text{AlC}$ | hP8 | $\text{P6}_3/\text{mmc}$<br>(194) | 2.978 |       | 12.945 | -33.050 |
| $(\text{Mo}_{0.50}\text{V}_{0.50})_2\text{GaC}$            | $\text{Cr}_2\text{AlC}$ | hP8 | $\text{P6}_3/\text{mmc}$<br>(194) | 2.996 |       | 13.124 | -33.588 |
| SQS                                                        | $\text{Cr}_2\text{AlC}$ | hP8 | $\text{P6}_3/\text{mmc}$<br>(194) | 3.009 |       | 13.030 | -33.512 |
| $(\text{Mo}_{0.75}\text{V}_{0.25})_2\text{GaC}$            | $\text{Cr}_2\text{AlC}$ | hP8 | $\text{P6}_3/\text{mmc}$<br>(194) | 3.017 |       | 13.349 | -33.967 |
| SQS                                                        | $\text{Cr}_2\text{AlC}$ | hP8 | $\text{P6}_3/\text{mmc}$<br>(194) | 3.043 |       | 13.108 | -33.976 |
|                                                            |                         |     |                                   |       |       |        |         |
| $(\text{Mo}_{0.25}\text{V}_{0.75})\text{C}$                | NaCl                    | cF8 | Fm-3m<br>(225)                    | 4.247 | 4.247 | 4.227  | -19.262 |
| SQS                                                        | NaCl                    | cF8 | Fm-3m<br>(225)                    | 4.224 | 4.230 | 4.229  | -19.296 |
| $(\text{Mo}_{0.50}\text{V}_{0.50})\text{C}$                | NaCl                    | cF8 | Fm-3m<br>(225)                    | 4.244 | 4.287 | 4.287  | -19.384 |
| SQS                                                        | NaCl                    | cF8 | Fm-3m<br>(225)                    | 4.285 | 4.280 | 4.285  | -19.420 |
| $(\text{Mo}_{0.75}\text{V}_{0.25})\text{C}$                | NaCl                    | cF8 | Fm-3m<br>(225)                    | 4.349 | 4.349 | 4.361  | -19.522 |
| SQS                                                        | NaCl                    | cF8 | Fm-3m<br>(225)                    | 4.329 | 4.343 | 4.321  | -19.541 |
|                                                            |                         |     |                                   |       |       |        |         |
| $(\text{Mo}_{0.25}\text{V}_{0.75})\text{C}_{1-x}$ (x=0.25) | NaCl                    | cF8 | Fm-3m<br>(225)                    | 4.129 | 4.129 | 4.179  | -17.069 |
| SQS                                                        | NaCl                    | cF8 | Fm-3m<br>(225)                    | 4.232 | 4.202 | 4.217  | -17.028 |
| $(\text{Mo}_{0.50}\text{V}_{0.50})\text{C}_{1-x}$ (x=0.25) | NaCl                    | cF8 | Fm-3m<br>(225)                    | 4.266 | 4.266 | 4.121  | -17.105 |
| SQS on both sublattices                                    | NaCl                    | cF8 | Fm-3m<br>(225)                    | 4.217 | 4.208 | 4.227  | -17.283 |
| $(\text{Mo}_{0.75}\text{V})_{0.25}\text{C}_{1-x}$ (x=0.25) | NaCl                    | cF8 | Fm-3m<br>(225)                    | 4.341 | 4.341 | 4.179  | -17.252 |
| SQS on both sublattices                                    | NaCl                    | cF8 | Fm-3m<br>(225)                    | 4.277 | 4.257 | 4.257  | -17.456 |
| SQS on X sublattice only                                   | NaCl                    | cF8 | Fm-3m<br>(225)                    | 4.261 | 4.262 | 4.268  | -17.484 |
|                                                            |                         |     |                                   |       |       |        |         |
| $(\text{Mo}_{0.25}\text{V}_{0.75})_2\text{C}$              | NiAs                    | hP4 | $\text{P6}_3/\text{mmc}$<br>(194) | 2.949 |       | 4.581  | -29.444 |
| SQS                                                        | NiAs                    | hP4 | $\text{P6}_3/\text{mmc}$<br>(194) | 2.946 |       | 4.560  | -29.042 |

|                                                                              |      |      |                               |       |  |        |         |
|------------------------------------------------------------------------------|------|------|-------------------------------|-------|--|--------|---------|
| SQS on X sublattice only                                                     | NiAs | hP4  | P6 <sub>3</sub> /mmc<br>(194) | 2.946 |  | 4.560  | -29.451 |
| (Mo <sub>0.50</sub> V <sub>0.50</sub> ) <sub>2</sub> C                       | NiAs | hP4  | P6 <sub>3</sub> /mmc<br>(194) | 2.984 |  | 4.588  | -30.087 |
| SQS                                                                          | NiAs | hP4  | P6 <sub>3</sub> /mmc<br>(194) | 2.993 |  | 4.586  | -30.035 |
| (Mo <sub>0.75</sub> V <sub>0.25</sub> ) <sub>2</sub> C                       | NiAs | hP4  | P6 <sub>3</sub> /mmc<br>(194) | 3.036 |  | 4.621  | -30.591 |
| SQS                                                                          | NiAs | hP4  | P6 <sub>3</sub> /mmc<br>(194) | 3.035 |  | 4.621  | -30.559 |
|                                                                              |      |      |                               |       |  |        |         |
| V <sub>2</sub> Ga <sub>2</sub> C                                             | 221  | hP10 | P6 <sub>3</sub> /mmc<br>(194) | 2.946 |  | 17.861 | -35.617 |
|                                                                              |      |      |                               |       |  |        |         |
| (Mo <sub>0.125</sub> V <sub>0.875</sub> ) <sub>2</sub> Ga <sub>2</sub> C SQS | 221  | hP10 | P6 <sub>3</sub> /mmc<br>(194) | 2.960 |  | 17.917 | -35.894 |
| (Mo <sub>0.25</sub> V <sub>0.75</sub> ) <sub>2</sub> Ga <sub>2</sub> C       | 221  | hP10 | P6 <sub>3</sub> /mmc<br>(194) | 2.957 |  | 18.092 | -36.210 |
| SQS                                                                          | 221  | hP10 | P6 <sub>3</sub> /mmc<br>(194) | 2.975 |  | 17.978 | -36.158 |
| (Mo <sub>0.333</sub> V <sub>0.667</sub> ) <sub>2</sub> Ga <sub>2</sub> C     | 221  | hP10 | P6 <sub>3</sub> /mmc<br>(194) | 2.966 |  | 18.102 | -36.403 |
| (Mo <sub>0.375</sub> V <sub>0.625</sub> ) <sub>2</sub> Ga <sub>2</sub> C SQS | 221  | hP10 | P6 <sub>3</sub> /mmc<br>(194) | 2.984 |  | 18.006 | -36.414 |
| (Mo <sub>0.5</sub> V <sub>0.5</sub> ) <sub>2</sub> Ga <sub>2</sub> C         | 221  | hP10 | P6 <sub>3</sub> /mmc<br>(194) | 3.003 |  | 18.062 | -36.689 |
| SQS                                                                          | 221  | hP10 | P6 <sub>3</sub> /mmc<br>(194) | 3.001 |  | 18.077 | -36.668 |
| (Mo <sub>0.625</sub> V <sub>0.375</sub> ) <sub>2</sub> Ga <sub>2</sub> C SQS | 221  | hP10 | P6 <sub>3</sub> /mmc<br>(194) | 3.012 |  | 18.101 | -36.920 |
| (Mo <sub>0.667</sub> V <sub>0.333</sub> ) <sub>2</sub> Ga <sub>2</sub> C     | 221  | hP10 | P6 <sub>3</sub> /mmc<br>(194) | 3.010 |  | 18.201 | -37.105 |
| (Mo <sub>0.75</sub> V <sub>0.25</sub> ) <sub>2</sub> Ga <sub>2</sub> C       | 221  | hP10 | P6 <sub>3</sub> /mmc<br>(194) | 3.028 |  | 18.256 | -37.256 |
| SQS                                                                          | 221  | hP10 | P6 <sub>3</sub> /mmc<br>(194) | 3.034 |  | 18.134 | -37.171 |
| (Mo <sub>0.875</sub> V <sub>0.125</sub> ) <sub>2</sub> Ga <sub>2</sub> C SQS | 221  | hP10 | P6 <sub>3</sub> /mmc<br>(194) | 3.052 |  | 18.129 | -37.424 |
|                                                                              |      |      |                               |       |  |        |         |
| Mo <sub>2</sub> Ga <sub>2</sub> C                                            | 221  | hP10 | P6 <sub>3</sub> /mmc<br>(194) | 3.064 |  | 18.153 | -37.692 |
|                                                                              |      |      |                               |       |  |        |         |
| V <sub>3</sub> Ga <sub>2</sub> C <sub>2</sub>                                | 322  | hP14 | P6 <sub>3</sub> /mmc<br>(194) | 2.953 |  | 22.621 | -55.034 |
| Mo <sub>3</sub> Ga <sub>2</sub> C <sub>2</sub>                               | 322  | hP14 | P6 <sub>3</sub> /mmc<br>(194) | 3.085 |  | 23.177 | -57.306 |

|                                     |                       |      |                                   |       |  |        |         |
|-------------------------------------|-----------------------|------|-----------------------------------|-------|--|--------|---------|
| $\text{VMo}_2\text{Ga}_2\text{C}_2$ | 322                   | hP14 | $\text{P6}_3/\text{mmc}$<br>(194) | 3.001 |  | 23.251 | -57.006 |
| $\text{MoV}_2\text{Ga}_2\text{C}_2$ | 322                   | hP14 | $\text{P6}_3/\text{mmc}$<br>(194) | 3.006 |  | 22.854 | -55.571 |
|                                     |                       |      |                                   |       |  |        |         |
| $\text{V}_4\text{Ga}_2\text{C}_3$   | 423                   | hP18 | $\text{P6}_3/\text{mmc}$<br>(194) | 2.936 |  | 27.577 | -74.302 |
| $\text{Mo}_4\text{Ga}_2\text{C}_3$  | 423                   | hP18 | $\text{P6}_3/\text{mmc}$<br>(194) | 3.145 |  | 27.708 | -77.008 |
|                                     |                       |      |                                   |       |  |        |         |
| $(\text{VMo}_2)\text{GaC}_2$        | 312 biMAX<br>(type A) | hP12 | $\text{P6}_3/\text{mmc}$<br>(194) | 2.996 |  | 18.442 | -53.722 |

**Table S2.** All different ordered alloys considered in this work, including supercell sizes and enthalpies. The figures can be found in the folder “mov\_alloy\_figures”.

| Phase                                           | Figure | Supercell size | H (eV/f.u.) |
|-------------------------------------------------|--------|----------------|-------------|
| $\text{Mo}_{0.25}\text{V}_{0.75}$               | 1a     | 2x2x2          | -9.615      |
|                                                 | 1b     | 4x4x4          | -9.597      |
| $\text{Mo}_{0.5}\text{V}_{0.5}$                 | 1c     | 2x2x2          | -10.082     |
|                                                 | 1d     | 2x2x2          | -10.077     |
|                                                 | 1e     | 2x2x2          | -10.077     |
|                                                 | 1f     | 4x4x4          | -10.028     |
| $\text{Mo}_{0.75}\text{V}_{0.25}$               | 1g     | 2x2x2          | -10.509     |
|                                                 | 1h     | 4x4x4          | -10.473     |
| $(\text{Mo}_{0.25}\text{V}_{0.75})_2\text{GaC}$ | 2a     | 1x1x1          | -33.082     |
|                                                 | 2b     | 1x1x2          | -33.074     |
| $(\text{Mo}_{0.5}\text{V}_{0.5})_2\text{GaC}$   | 2c     | 1x1x1          | -33.576     |
|                                                 | 2d     | 1x1x1          | -33.588     |
|                                                 | 2e     | 1x1x1          | -33.455     |
| $(\text{Mo}_{0.75}\text{V}_{0.25})_2\text{GaC}$ | 2f     | 1x1x1          | -33.967     |
|                                                 | 2g     | 1x1x2          | -33.964     |
| $\text{Mo}_{0.25}\text{V}_{0.75}\text{C}$       | 3a     | 1x1x1          | -19.262     |
|                                                 | 3b     | 2x2x2          | -19.262     |
| $\text{Mo}_{0.5}\text{V}_{0.5}\text{C}$         | 3c     | 2x2x2          | -19.374     |

|                                                            |    |                       |         |
|------------------------------------------------------------|----|-----------------------|---------|
|                                                            | 3d | 1x1x1                 | -19.384 |
|                                                            |    |                       |         |
| $\text{Mo}_{0.75}\text{V}_{0.25}\text{C}$                  | 3e | 1x1x1                 | -19.521 |
|                                                            | 3f | 2x2x2                 | -19.522 |
|                                                            |    |                       |         |
| $(\text{Mo}_{0.25}\text{V}_{0.75})\text{C}_{1-x}$ (x=0.25) | 4a | 2x2x2                 | -16.985 |
|                                                            | 4b | 2x2x2                 | -17.069 |
|                                                            |    |                       |         |
| $(\text{Mo}_{0.5}\text{V}_{0.5})\text{C}_{1-x}$ (x=0.25)   | 4c | 2x2x2                 | -17.227 |
|                                                            | 4d | 2x2x2                 | -17.105 |
|                                                            | 4e | 2x2x2                 | -17.128 |
|                                                            |    |                       |         |
| $(\text{Mo}_{0.75}\text{V}_{0.25})\text{C}_{1-x}$ (x=0.25) | 4f | 2x2x2                 | -17.484 |
|                                                            | 4g | 2x2x2                 | -17.252 |
|                                                            | 4h | 2x2x2                 | -17.415 |
|                                                            |    |                       |         |
| $(\text{Mo}_{0.25}\text{V}_{0.75})_2\text{C}$              | 5a | 4x4x2                 | -30.559 |
|                                                            | 5b | 2x2x2                 | -30.591 |
|                                                            | 5c | 4x4x2                 | -30.150 |
|                                                            |    |                       |         |
| $(\text{Mo}_{0.5}\text{V}_{0.5})_2\text{C}$                | 5d | 4x4x2                 | -30.035 |
|                                                            | 5e | 2x2x2                 | -30.087 |
|                                                            | 5f | 4x4x2                 | -29.616 |
|                                                            |    |                       |         |
| $(\text{Mo}_{0.75}\text{V}_{0.25})_2\text{C}$              | 5g | 4x4x2                 | -30.559 |
|                                                            | 5h | 2x2x2                 | -30.591 |
|                                                            | 5i | 4x4x2                 | -30.150 |
|                                                            |    |                       |         |
| $(\text{Mo}_{0.25}\text{V}_{0.75})_2\text{Ga}_2\text{C}$   | 6a | 1x1x1                 | -36.146 |
|                                                            | 6b | 1x1x2                 | -36.210 |
|                                                            | 6c | 2x1x1                 | -36.133 |
|                                                            |    |                       |         |
| $(\text{Mo}_{0.333}\text{V}_{0.667})_2\text{Ga}_2\text{C}$ | 6d | 1x1x3                 | -36.403 |
|                                                            | 6e | $\sqrt{3}x\sqrt{3}x1$ | -36.115 |
|                                                            |    |                       |         |
| $(\text{Mo}_{0.5}\text{V}_{0.5})_2\text{Ga}_2\text{C}$     | 6f | 1x1x1                 | -36.682 |
|                                                            | 6g | 1x1x1                 | -36.689 |
|                                                            | 6h | 1x1x1                 | -36.620 |
|                                                            | 6i | 1x1x2                 | -36.616 |
|                                                            | 6j | 2x1x1                 | -36.648 |
|                                                            | 6k | 2x1x1                 | -36.658 |
|                                                            | 6l | 4x1x1                 | -36.687 |
|                                                            | 6m | 4x1x1                 | -36.648 |
|                                                            | 6n | 4x1x1                 | -36.662 |
|                                                            | 6o | 4x1x1                 | -36.682 |
|                                                            | 6p | 4x1x1                 | -36.661 |

|                                                                          |    |                                     |         |
|--------------------------------------------------------------------------|----|-------------------------------------|---------|
|                                                                          | 6q | 4x1x1                               | -36.682 |
|                                                                          | 6r | 1x1x3                               | -36.687 |
|                                                                          |    |                                     |         |
| (Mo <sub>0.667</sub> V <sub>0.333</sub> ) <sub>2</sub> Ga <sub>2</sub> C | 6s | 1x1x3                               | -37.105 |
|                                                                          | 6t | $\sqrt{3} \times \sqrt{3} \times 1$ | -36.821 |
|                                                                          |    |                                     |         |
| (Mo <sub>0.75</sub> V <sub>0.25</sub> ) <sub>2</sub> Ga <sub>2</sub> C   | 6u | 1x1x1                               | -37.181 |
|                                                                          | 6v | 1x1x2                               | -37.256 |
|                                                                          | 6w | 1x1x2                               | -37.169 |
|                                                                          |    |                                     |         |
